# Supplementary material
Source: publisher figshare collection journal article supplement (https://diabetesjournals.figshare.com/ndownloader/files/33405137)

## ONLINE SUPPLEMENT

**Table S1. Comparison between COVID-19 and control patients.** Key clinical characteristics of patients with COVID-19 are compared to those of control patients. Three groups of controls were considered as described in the text. For the propensity score matched groups, in addition to p-values, absolute standardized mean differences (SMD) are shown.

|                                                        | All<br>COVID-19 | Controls        |         |                 |         | Propensity score matching |                 |        |       |
|--------------------------------------------------------|-----------------|-----------------|---------|-----------------|---------|---------------------------|-----------------|--------|-------|
|                                                        |                 | All             | p       | Manual match    | p       | COVID-19                  | Controls        | p      | SMD   |
| Number                                                 | 100             | 595             |         | 100             |         | 87                        | 87              |        |       |
| Age, years                                             | 67.8 (27.6)     | 52.2 (16.3)     | <0.001  | 67.3 (13.7)     | 0.802   | 64.8 (16.9)               | 63.0 (17.7)     | 0.475  | 0.109 |
| Male sex, %                                            | 59.0            | 46.6            | 0.021   | 59.0            | 1.000   | 59.8                      | 57.5            | 0.760  | 0.033 |
| Diabetes, %                                            | 18.0            | 15.3            | 0.492   | 18.0            | 1.000   | 20.7                      | 14.9            | 0.325  | 0.107 |
| Smoking, %                                             | 8.0             | 18.0            | 0.015   | 8.0             | 1.000   | 8.0                       | 12.6            | 0.376  | 0.107 |
| Obesity, %                                             | 18.0            | 12.1            | 0.104   | 18.0            | 1.000   | 19.5                      | 16.1            | 0.555  | 0.064 |
| Hypertension, %                                        | 54.0            | 25.4            | <0.001  | 58.6            | <0.001  | 50.6                      | 47.1            | 0.651  | 0.049 |
| Cardiovascular disease, %                              | 20.0            | 6.7             | <0.001  | 26.7            | 0.030   | 18.4                      | 16.1            | 0.690  | 0.043 |
| Chronic kidney disease, %                              | 13.0            | 7.2             | 0.050   | 18.3            | 0.272   | 13.8                      | 13.8            | 1.000  | 0.000 |
| Anti-platelet agents, %                                | 23.0            | 12.8            | 0.007   | 37.1            | <0.001  | 23.0                      | 24.1            | 0.859  | 0.019 |
| RAS blockers, %                                        | 39.0            | 16.1            | <0.001  | 40.0            | <0.001  | 35.6                      | 35.6            | 1.000  | 0.000 |
| Statin, %                                              | 27.0            | 11.8            | <0.001  | 30.0            | 0.097   | 25.3                      | 23.0            | 0.725  | 0.038 |
| HSPC phenotype                                         |                 |                 |         |                 |         |                           |                 |        |       |
| CD34 <sup>+</sup> /10 <sup>6</sup>                     | 159.2 (196.2)   | 426.5 (196.0)   | <0.001* | 400.8 (289.5)   | <0.001# | 156.5 (110.1)             | 396.1 (198.4)   | <0.001 | -     |
| CD34 <sup>+</sup> CD45 <sup>dim</sup> /10 <sup>6</sup> | 120.3 (179.0)   | 284.2 (179.0)   | <0.001* | 319.4 (191.4)   | <0.001# | 120.2 (103.1)             | 260.0 (152.1)   | <0.001 | -     |
| CD34 <sup>+</sup> CD133 <sup>+</sup> /10 <sup>6</sup>  | 60.5 (101.6)    | 133.5 (101.6)   | <0.001* | 159.5 (110.2)   | <0.001# | 62.1 (66.2)               | 129.4 (77.7)    | <0.001 | -     |
| CD34 <sup>+</sup> / ml                                 | 1045.0 (1439.7) | 2855.1 (1439.7) | <0.001* | 2781.9 (1500.3) | <0.001# | 1062.0 (918.9)            | 2648.3 (1182.4) | <0.001 | -     |
| CD34 <sup>+</sup> CD45 <sup>dim</sup> / ml             | 807.8 (1452.4)  | 2277.5 (1452.4) | <0.001* | 2421.3 (1451.6) | <0.001# | 832.7 (860.6)             | 2075.2 (1145.0) | <0.001 | -     |
| CD34 <sup>+</sup> CD133 <sup>+</sup> / ml              | 430.1 (798.8)   | 1055.2 (798.8)  | <0.001* | 1200.2 (824.6)  | <0.001# | 454.6 (597.6)             | 1035.3 (591.8)  | <0.001 | -     |

RAS, renin angiotensin system. \* Adjusted for age, sex, smoking, hypertension, cardiovascular disease, chronic kidney disease, and use of medications. # Adjusted for hypertension, cardiovascular disease, anti-platelet agents, and RAS blockers.

**Table S2. Outcome analysis.** The association between one standard deviation (SD) change in CD34<sup>+</sup> hematopoietic stem/progenitor cells (HSPCs) with the primary outcome (poor COVID-19 course, dependent variable) was ascertained by means of logistic regression models adjusted for an increasing number of co-variates. Model 1 was adjusted for age and sex. Model 2 was further adjusted for covariates at baseline and run first without HSPCs (to show the effects of FPG) and then with HSPCs. Model 3 was fully adjusted for all confounders. Odds ratios (OR) are shown along with 95% confidence intervals (C.I.).

|                                        | Model 1          |       | Model 2 without HSPCs |       | Model 2 with HSPCs |       | Model 3          |        |
|----------------------------------------|------------------|-------|-----------------------|-------|--------------------|-------|------------------|--------|
| Variable                               | OR (95% C.I.)    | p     | OR (95% C.I.)         | p     | OR (95% C.I.)      | p     | OR (95% C.I.)    | p      |
| Age (/10 years)                        | 1.00 (0.76-0.13) | 0.978 | 0.78 (0.54-1.13)      | 0.176 | 0.69 (0.46-1.04)   | 0.077 | 0.98 (0.92-1.03) | 0.347  |
| Sex (male vs. female)                  | 0.94 (0.36-2.43) | 0.895 | 1.00 (0.36-2.78)      | 0.993 | 1.00 (0.34-2.90)   | 0.994 | 0.55 (0.12-2.58) | 0.452  |
| CHD (yes vs. no)                       | -                | -     | 2.37 (0.54-10.3)      | 0.251 | 2.40 (0.50-11.5)   | 0.271 | 3.03 (0.27-34.1) | 0.370  |
| eGFR (/10 ml/min/1.73 m <sup>2</sup> ) | -                | -     | 0.76 (0.62-0.95)      | 0.013 | 0.75 (0.59-0.75)   | 0.018 | 0.73 (0.53-1.01) | 0.057  |
| FPG (/mmol/l)                          | -                | -     | 1.17 (1.01-1.35)      | 0.033 | 1.14 (0.98-1.32)   | 0.083 | 1.07 (0.86-1.34) | 0.554  |
| Peak CRP (/10 mg/l)                    | -                | -     | -                     | -     | -                  | -     | 1.08 (0.99-1.19) | 0.085  |
| High-flow oxygen (yes vs. no)          | -                | -     | -                     | -     | -                  | -     | 27.7 (4.92-155)  | <0.001 |
| N/L ratio (/unit)                      | -                | -     | -                     | -     | -                  | -     | 0.99 (0.90-1.10) | 0.859  |
| CD34 <sup>+</sup> HSPCs (/SD)          | 0.30 (0.14-0.63) | 0.002 | -                     | -     | 0.32 (0.14-0.73)   | 0.006 | 0.32 (0.11-0.93) | 0.036  |

CHD, chronic heart disease; eGFR, estimated glomerular filtration rate, FPG, fasting plasma glucose; CRP, C-reactive protein; N/L neutrophil/lymphocyte.

**Table S3. Mediation analysis.** The association between one mmol/l change in fasting plasma glucose (FPG) and the primary outcome (dependent variable) was evaluated with and without

| Variable                                | Model without HSPCs |       | Model with HSPCs |       |
|-----------------------------------------|---------------------|-------|------------------|-------|
|                                         | OR (95% C.I.)       | p     | OR (95% C.I.)    | p     |
| Age (/ year)                            | 0.78 (0.54-1.13)    | 0.176 | 0.69 (0.46-1.04) | 0.077 |
| Sex male                                | 1.00 (0.36-2.78)    | 0.993 | 1.00 (0.34-2.90) | 0.994 |
| CHD (yes vs no)                         | 2.37 (0.54-10.3)    | 0.251 | 2.40 (0.50-11.5) | 0.271 |
| eGFR (/ 10 ml/min/1.73 m <sup>2</sup> ) | 0.76 (0.62-0.95)    | 0.013 | 0.75 (0.59-0.95) | 0.018 |
| FPG (/ mmol/l)                          | 1.17 (1.01-1.35)    | 0.033 | 1.14 (0.98-1.32) | 0.083 |
| HSPCs (/ SD)                            | -                   | -     | 0.32 (0.14-0.73) | 0.006 |

CHD, chronic heart disease; eGFR, estimated glomerular filtration rate. HSPCs, hematopoietic stem/progenitor cells.

**Figure S1. The gating strategy for quantification of HSPCs.** Cells were labelled with the following monoclonal antibodies: phycoerythrin (PE)-labelled anti-human CD34 (20  $\mu$ l, BD Biosciences), allophycocyanin (APC)-labelled anti-human CD133 (5  $\mu$ l, Beckman Coulter), and Electron Coupled Dye (ECD)-labelled anti-human CD45 (10  $\mu$ l Beckman Coulter). After red blood cell lysis, the analysis was run on a Beckman Coulter analyzer (NAVIOS EX Flow Cytometer) with a target of  $10^6$  total cytometric events (actual average achieved  $0.95 \times 10^6$ ). Data were analyzed by Kaluza software (Beckman Coulter). Different definitions of HSPCs were used. After selecting the mononuclear cell fraction in the morphological side scatter versus forward scatter gate, total CD34<sup>+</sup> cells were quantified in the FSC vs CD34 fluorescence intensity plot for comparability with previous studies and with the literature. Identity of CD34<sup>+</sup> cells as HSPC was further confirmed by low expression of CD45, thus identifying CD34<sup>+</sup>CD45<sup>dim</sup> cells. In addition, we determined co-expression of the stem cell marker CD133 con the CD34<sup>+</sup>CD45<sup>dim</sup> population (CD34<sup>+</sup>CD133<sup>+</sup> HSPCs). The same trained operator performed the analysis throughout the study. Relative cell count was expressed as cells /  $10^6$  events (WBC), while absolute cell count was reported per ml of blood. The absolute cell count was obtained by multiplying relative cell count x WBC (white blood cell count,  $\times 10^3/\text{mL}$ ).

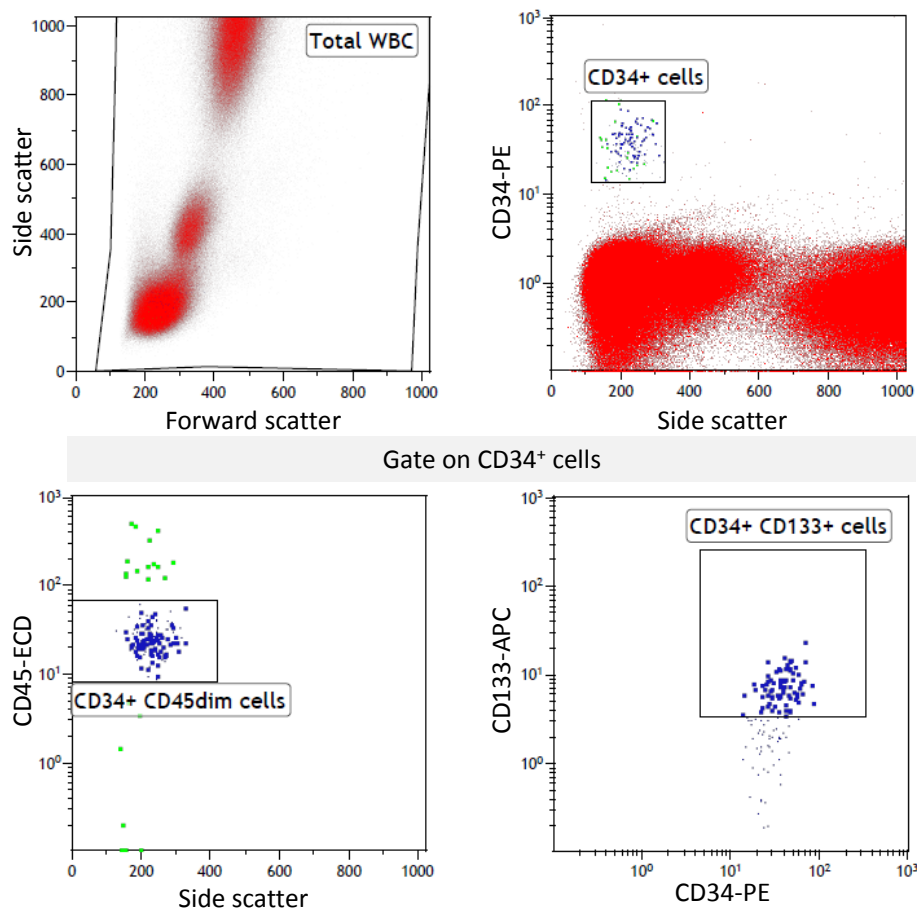

**Figure S2. Hyperglycemia and HSPCs in COVID-19.** Levels of hematopoietic stem/progenitor cells (HSPCs) are shown in COVID-19 patients divided between patients with and without hyperglycemia defined based on the standard 7.0 mmol/l threshold for fasting plasma glucose (FPG). Data are presented for all the three phenotypes expressed as absolute or relative cell counts in peripheral blood. Columns height represents mean and bars represent standard error. Superimposed data points are referred to individual patients. P-values are shown for the between-group comparisons.

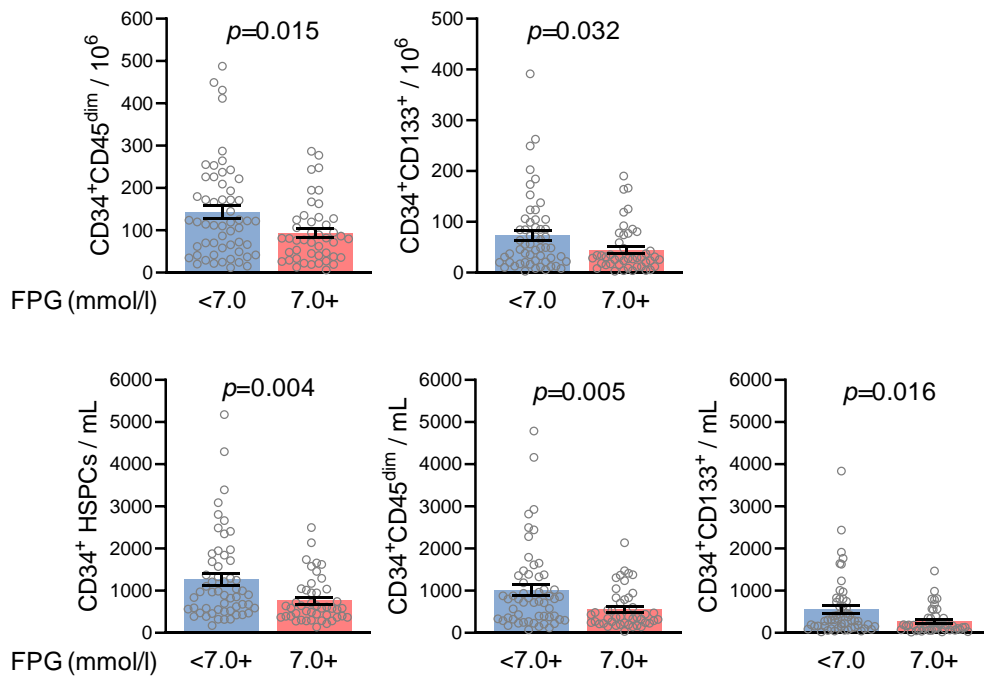

**Figure S3. HSPC levels and in-hospital outcome of COVID-19.** Levels of hematopoietic stem/progenitor cells (HSPCs) are shown in COVID-19 patients divided based on the occurrence or not of the primary endpoint of poor outcome, defined as admittance to the intensive care unit or death. Data are presented for all the three phenotypes expressed as absolute or relative cell counts in peripheral blood. Columns height represents mean and bars represent standard error. Superimposed data points are referred to individual patients. P-values are shown for the between-group comparisons.

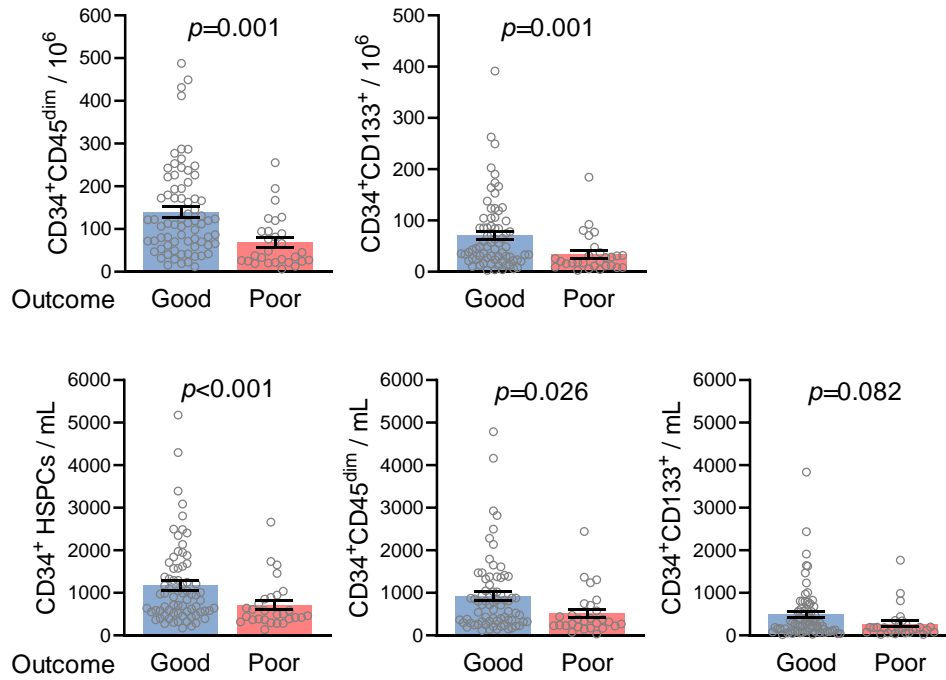

**Figure S4. HSPC levels and vital status at 6 months.** Levels of hematopoietic stem/progenitor cells (HSPCs) are shown in COVID-19 patients divided based on vital status at 6 months after hospitalization for COVID-19. Data are presented for all the three phenotypes expressed as absolute or relative cell counts in peripheral blood. Columns height represents mean and bars represent standard error. Superimposed data points are referred to individual patients. P-values are shown for the between-group comparisons.

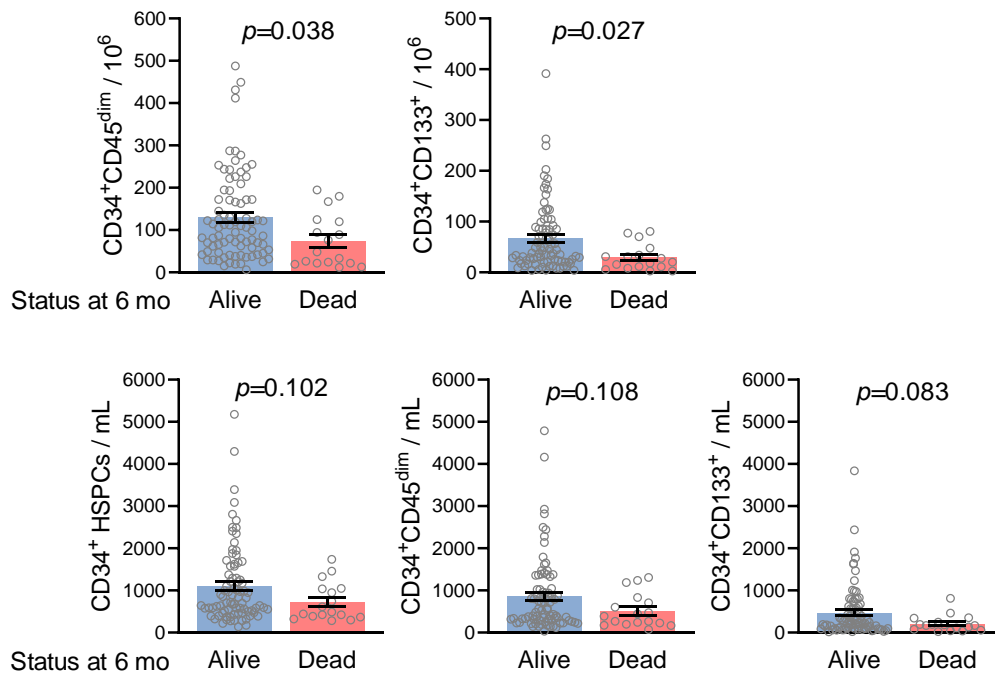

Supplement: Supplementary file 1 [file 33405137]
